# Supplementary material for: Application of modified CNTs with Ti(SO4)2 in selective oxidation of dimethyl ether
Source: Royal Society of Chemistry journal article supplement (doi:10.1039/c6cy01367h), 2016-01-01
Supplement: c6cy01367h1.pdf [file c6cy01367h1.pdf]

## Application of modified CNTs with $\text{Ti}(\text{SO}_4)_2$ in selective oxidation of dimethyl ether

Qingde Zhang,<sup>a</sup> Wenfeng Wang,<sup>a,b</sup> Zhenzhou Zhang,<sup>a,b</sup> Junfeng Zhang,<sup>a</sup> Yunxing Bai,<sup>a,b</sup> Noritatsu Tsubaki,<sup>a,c</sup> Yizhuo Han<sup>a\*</sup> and Yisheng Tan<sup>a\*</sup>

### FT-IR spectra

FT-IR spectra were measured on a Bruker Tensor 27 instrument with MCT detector.

### Thermal gravimetric analysis (TGA)

TGA was conducted on a Setaram Setsys Evolution. Weight loss was measured during a heat treatment up to 800°C with a rate of 5°C /min under air.

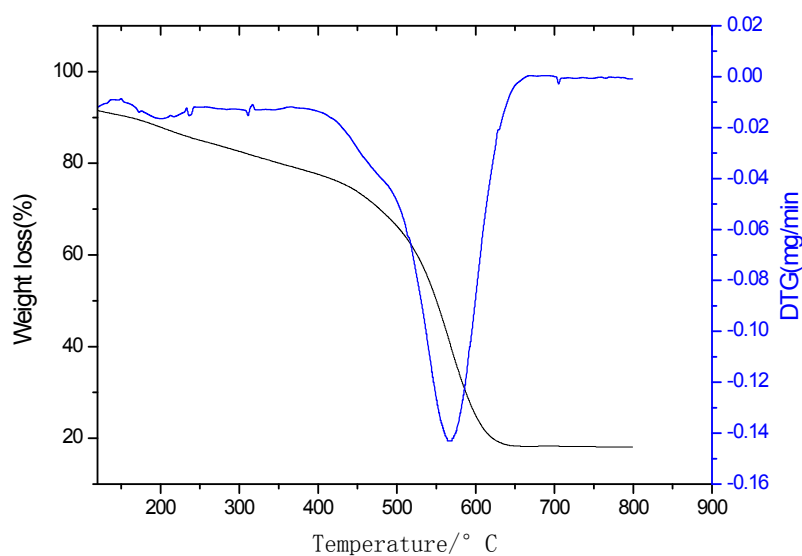

Fig. ESI-1 TG profiles of the 40% $\text{SO}_4^{2-}$ /CNTs calcined at 120°C.

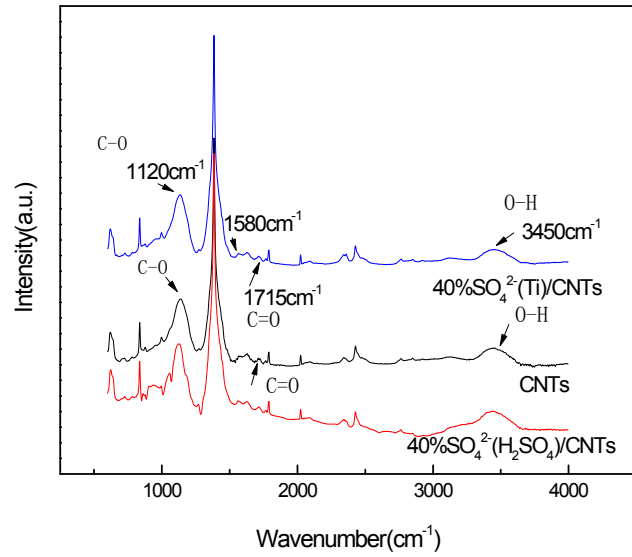

Fig. ESI-2 FT-IR of CNTs.

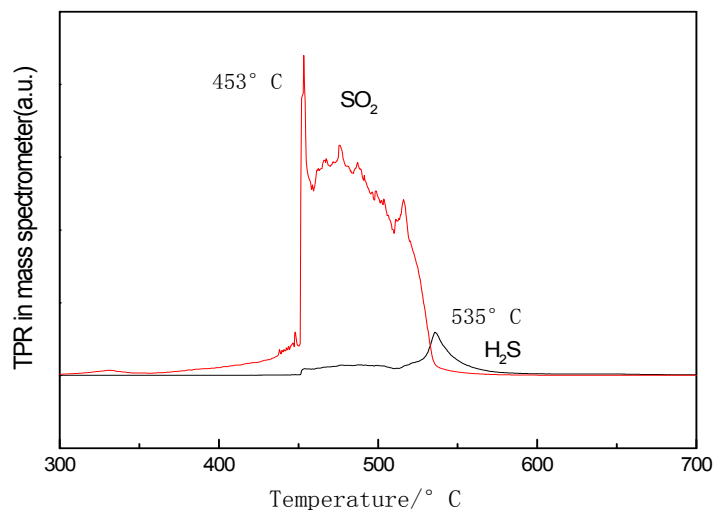

Fig. ESI-3 H<sub>2</sub>-TPR-MS of 40%SO<sub>4</sub><sup>2-</sup>/CNTs calcined at 240 $^{\circ}\text{C}$ .

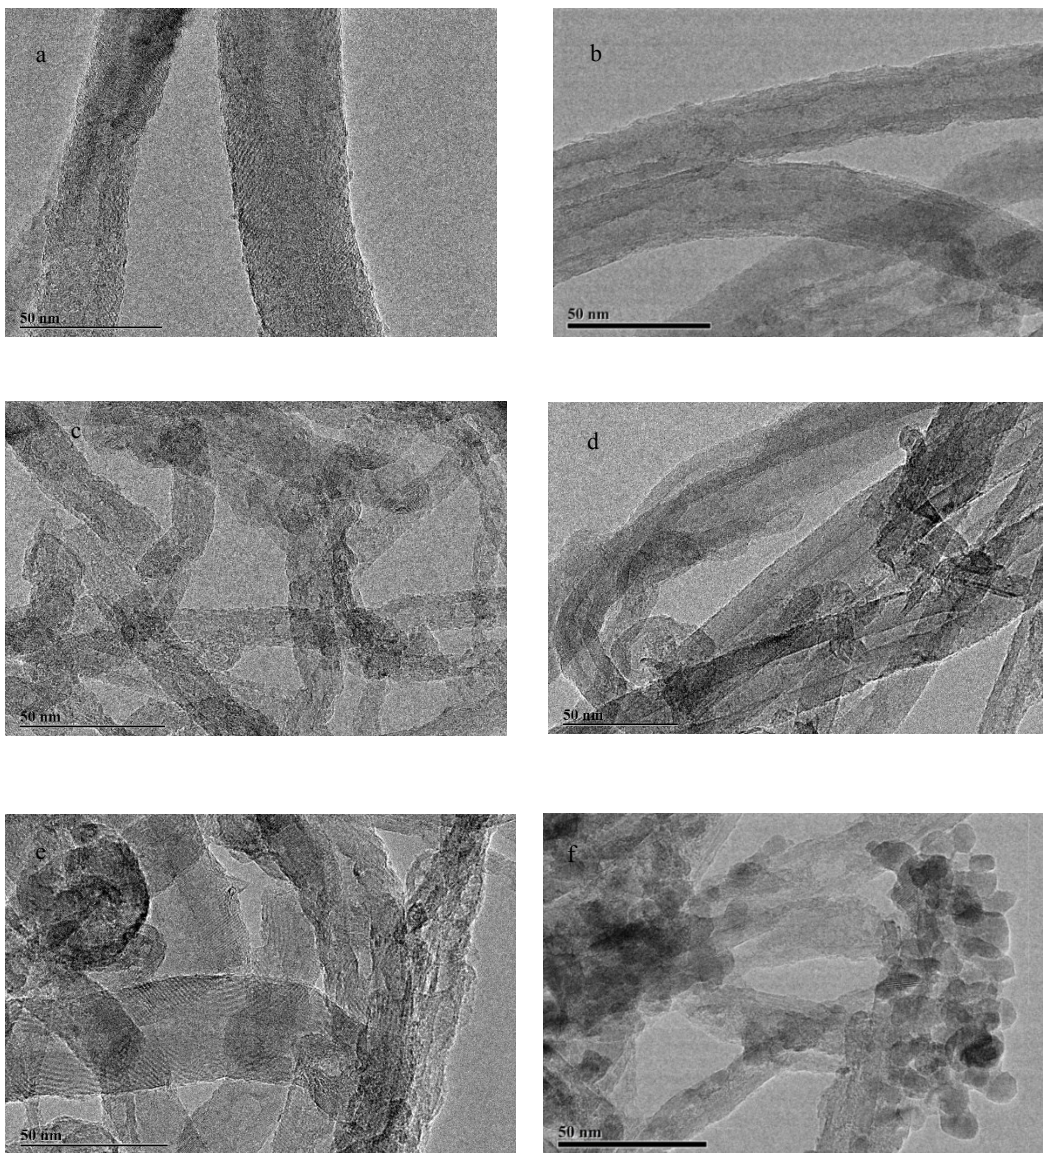

Fig. ESI-4 TEM images of the 40%SO<sub>4</sub><sup>2-</sup>/CNTs calcined at 200 °C (a), 240 °C (b), 300 °C (c), 400 °C (d), 450 °C (e) and 500 °C (f).

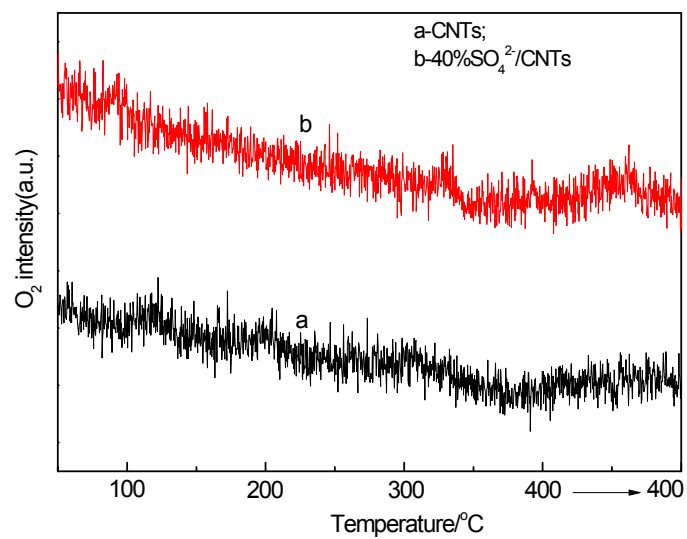

Fig. ESI-5 O<sub>2</sub>-TPD-MS of CNTs and 40%SO<sub>4</sub><sup>2-</sup>(Ti)/CNTs calcined at 400°C

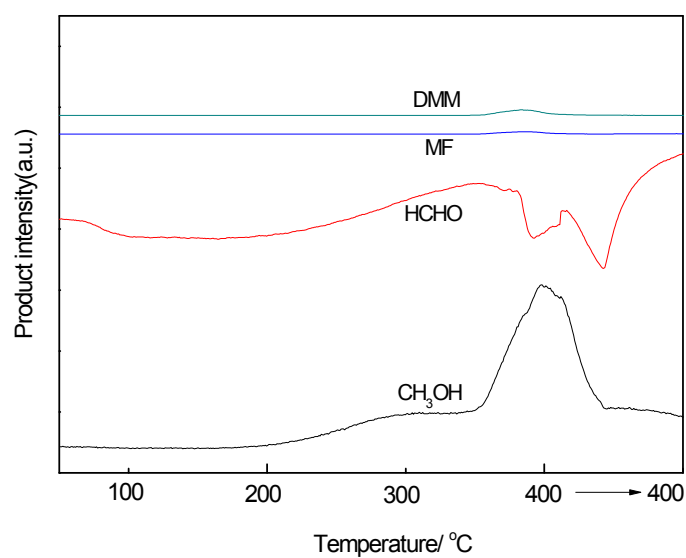

Fig. ESI-6 DME-TPSR-MS of 40%SO<sub>4</sub><sup>2-</sup>(Ti)/CNTs calcined at 400°C

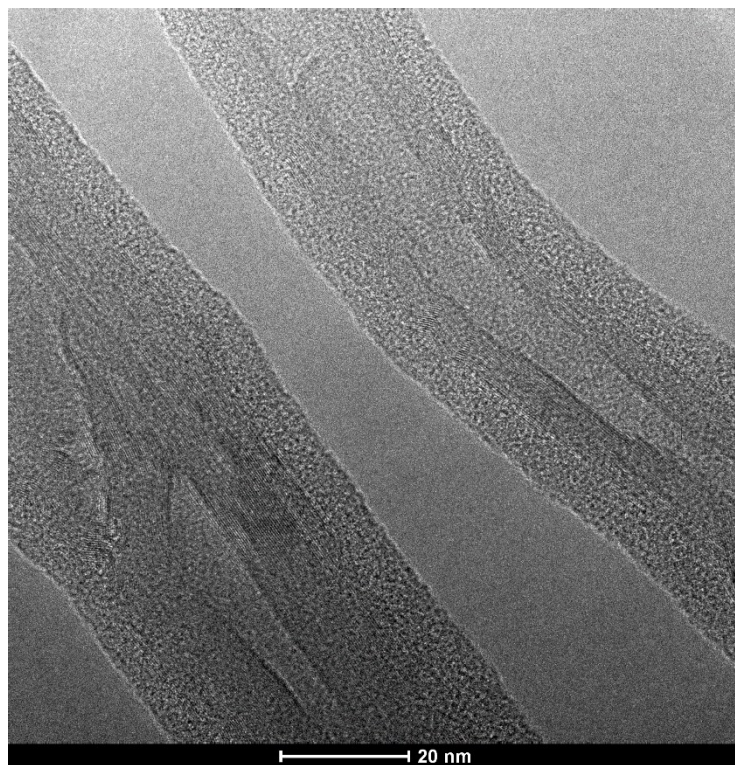

Fig. ESI-7 TEM images of the 40%SO<sub>4</sub>(H<sub>2</sub>SO<sub>4</sub>)/CNTs calcined at 240°C.

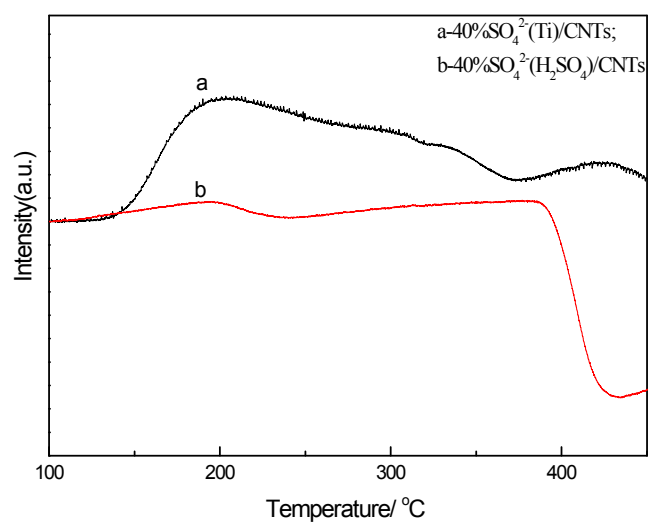

Fig. ESI-8 NH<sub>3</sub>-TPD profiles of 40%SO<sub>4</sub><sup>2-</sup>(H<sub>2</sub>SO<sub>4</sub>)/CNTs and 40%SO<sub>4</sub><sup>2-</sup>(Ti)/CNTs calcined at 240 °C.

Table ESI-1 Results of NH<sub>3</sub>-TPD integration

| Catalyst                                | Weak acid<br>(mmol NH <sub>3</sub> /g) |
|-----------------------------------------|----------------------------------------|
| CNTs                                    | 0.029                                  |
| 10% SO <sub>4</sub> <sup>2-</sup> /CNTs | 0.125                                  |
| 30% SO <sub>4</sub> <sup>2-</sup> /CNTs | 0.161                                  |
| 40% SO <sub>4</sub> <sup>2-</sup> /CNTs | 0.174                                  |
| 50% SO <sub>4</sub> <sup>2-</sup> /CNTs | 0.126                                  |

Table ESI-2 Results of NH<sub>3</sub>-TPD integration for 40%SO<sub>4</sub><sup>2-</sup>/CNTs

| Calcination temperature (°C) | Weak acid<br>(mmol NH <sub>3</sub> /g) |
|------------------------------|----------------------------------------|
| 200                          | 0.537                                  |
| 240                          | 0.354                                  |
| 300                          | 0.201                                  |
| 400                          | 0.174                                  |
| 450                          | 0.153                                  |
| 500                          | 0.143                                  |

Table ESI-3 Surface composition results of 40%SO<sub>4</sub><sup>2-</sup>/CNTs at different calcination temperature from XPS

| Calcination temperature<br>(°C) | S <sup>6+</sup><br>(mol%) | Ti <sup>4+</sup><br>(mol%) | O<br>(mol%) |
|---------------------------------|---------------------------|----------------------------|-------------|
| 200                             | 4.15                      | 1.00                       | 28.2        |
| 240                             | 3.55                      | 0.94                       | 25.3        |
| 300                             | 2.53                      | 0.97                       | 19.6        |
| 400                             | 2.06                      | 1.15                       | 15.2        |
| 450                             | 1.81                      | 1.06                       | 13.4        |
| 500                             | 0.60                      | 3.14                       | 16.9        |
